# Supplementary material for: Predicting the risk of acute respiratory failure among asthma patients—the A2-BEST2 risk score: a retrospective study
Source: PeerJ journal article supplement (doi:10.7717/peerj.16211), 2023-10-24
Supplement: Data.7z [file Data.7z]

## Sheet: Sheet1
group	age	gender	econimic	culture	bronchiectasia	copd	emphysema	lungdamage	thoracocyllosis	cardiacinsufficiency	valvulardisease	cardiacenlargement	BMI	albumin	prealbumin	crp	wbc	pct	area	t	p	breath	mmap	spo	smoke	smokingcessation	smokeforyears	clinictimefrom	hormonetime	hormone	treat	sofa	mews
1	82	0	0	0	0	0	1	0	0	0	0	0	28.5483	43.8	167	6.7	8	0.07	16	37	95	21	98	99	0	0	0	45	50	3	0	4	3
1	42	1	1	1	0	0	0	0	0	1	0	1	21.5451	30.9	168.7	17.9	7.38	0.233	15	38	142	20	72	90	1	0	0	48	20	3	0	2	7
1	42	0	0	0	1	0	0	0	0	1	0	1	21.2031	32.9	168.7	17.9	7	0.233	16	38.5	140	21	73	90	1	0	0	45	18	3	0	1	10
1	46	0	0	0	1	0	0	0	0	0	0	1	25.8166	35.1	252	10.7	6	0.354	22	37.5	135	21	85	96	1	32	35	300	300	2	0	1	5
1	46	1	1	1	0	1	0	0	0	0	0	1	25.4581	34.1	252	10.7	6.88	0.354	21	37.1	131	20	86	95	1	35	33	360	360	1	0	0	4
1	63	0	0	1	0	0	0	0	0	0	0	0	24.9108	36.7	325	21.67	13.12	1.538	8	36.8	125	20	86	95	0	0	0	24	24	3	0	2	3
1	58	1	1	1	0	0	0	0	0	0	0	0	21.9713	31.5	137	117.61	8.52	7.31	35	37.8	120	28	110	96	1	0.3	45	21	21	1	1	1	5
1	63	1	0	1	0	1	0	0	0	0	0	0	24.977	36.7	325	21.67	15	1.538	9	37	120	22	87	96	0	0	0	20	20	2	0	1	4
1	75	0	1	0	0	1	0	0	0	0	0	0	21.3382	31.8	197	4.8	6.43	0.824	11	36.9	118	21	106	99	1	10	50	720	720	3	0	0	4
1	80	0	1	1	0	1	1	0	1	0	0	1	20.0155	32.5	63	115	8	0.958	41	36.8	117	21	99	96	1	22	43	70	70	1	1	1	4
1	58	0	1	1	1	1	0	0	0	0	0	0	21.5451	31.5	137	117.61	9.5	7.31	37	37	110	27	108	95	1	0.5	40	20	20	1	1	0	5
1	75	1	1	0	0	1	1	0	0	0	0	0	21.4536	30.8	197	4.8	6	0.824	13	37.2	110	22	107	100	0	12	52	700	700	1	0	0	3
1	80	1	1	0	0	1	0	0	0	0	0	0	19.5918	30.3	62	115	7.86	0.958	40	36.9	110	22	93	95	1	20	32	72	72	3	0	0	4
1	77	1	1	1	0	1	1	0	0	1	0	1	19.79	36	264	2.83	13.2	0.025	5	36.9	109	19	107	94	1	15	32	720	720	1	0	2	2
1	70	1	1	1	0	0	0	0	0	1	0	0	22.0317	28.5	66.4	170	5.2	10	25	38	107	24	88	90	1	0	0	24	24	3	0	2	6
1	54	0	1	1	1	0	0	0	0	0	0	0	26.9896	23.7	106.9	98	16.4	0.201	35	37.6	107	26	62	99	0	0	0	360	360	3	0	2	6
1	77	0	1	1	1	1	0	0	0	0	0	1	19.8839	31	264	2.83	13	0.025	7	36.8	106	20	107	95	1	16	28	700	700	2	0	1	2
1	66	1	1	1	0	0	0	0	0	0	0	0	27.6817	43.8	331	8.49	10.11	0.033	0	37.2	105	20	107	98	0	0	0	24	24	1	0	0	1
1	52	1	1	1	0	0	0	0	0	0	0	0	28.6851	35.8	222	1.86	11.34	0.287	5	36.8	105	23	98	96	1	0	30	3	3	1	1	0	3
1	70	0	1	2	0	0	0	0	0	0	0	0	22.151	28.5	66.4	170	5	10	27	37	105	23	89	91	1	0	0	20	20	1	1	1	6
1	54	1	0	1	0	0	0	0	0	0	0	0	27.2817	23.7	106.9	98	17	0.201	36	37.5	105	27	64	98	1	0	0	350	300	2	1	2	6
1	67	0	1	1	0	0	0	0	0	0	0	1	18.75	30	209	7.6	12.72	0.071	11	37.5	104	19	86	92	0	0	0	120	120	3	1	3	3
1	81	0	1	1	0	0	0	0	0	0	0	1	26.2917	35.1	233	16.55	8.02	0.065	23	36.9	103	18	86	96	1	0	42	24	24	1	0	2	1
1	49	0	1	1	0	0	1	0	0	0	0	0	28.6501	37.6	275	0	15	0.871	11	37.3	101	21	97	95	0	0	0	96	96	3	1	1	4
1	87	1	1	1	0	0	0	0	0	0	0	0	24.2215	36.9	116	73.1	10.45	0.14	10	36.7	101	18	90	96	0	0	0	120	120	3	1	1	1
1	82	1	1	1	0	0	1	0	0	0	0	1	28.3039	40.1	233	1.91	7.3	0.048	20	37.3	101	20	84	98	1	4	32	720	720	1	0	0	1
1	85	0	1	1	1	0	0	0	0	0	0	0	24.7475	38	268	1.55	9.9	0.013	13	37.5	100	23	109	98	1	0	0	700	700	2	0	0	3
1	66	0	1	1	0	0	0	0	0	0	0	0	26.6749	43.8	331	8.49	11	0.033	2	37.8	100	21	106	99	0	0	0	20	22	3	0	0	3
1	52	0	1	0	0	1	0	0	0	0	0	0	28.699	35.8	222	1.86	12	0.287	7	36.9	100	24	98	97	1	0	31	2	4	1	0	1	3
1	49	1	1	1	0	0	1	0	0	0	1	0	28.2828	38.6	275	0	14.87	0.871	12	37.1	100	20	97	96	1	0	0	95	95	2	0	1	1
1	81	0	1	1	0	0	0	0	0	0	0	0	23.597	35.9	110	73.1	10.4	0.15	13	37.7	100	19	89	98	0	0	0	100	122	2	0	0	1
1	81	1	1	0	0	1	1	0	0	0	0	0	26.3465	33.5	230	16.55	8	0.065	25	36.8	100	19	87	95	1	0	41	22	28	2	0	0	2
1	67	1	1	1	0	0	0	0	0	0	0	1	18.9036	30	209	7.6	12	0.071	13	37.2	100	18	87	93	1	0	0	100	100	3	0	1	3
1	82	0	1	1	0	0	0	1	0	0	0	0	28.3531	39.8	230	1.91	7	0.049	22	37.2	100	22	84	99	1	5	33	700	700	2	0	0	3
1	66	1	1	1	0	0	0	0	0	0	0	0	24.9135	41.1	198	0	12.6	0.071	0	37.5	98	22	114	96	1	0	0	48	48	3	0	1	3
1	96	1	0	0	0	1	0	0	0	0	0	0	24.6548	40.6	267	1.55	9.8	0.012	12	37.1	97	24	107	97	1	0	0	720	720	3	0	0	3
1	61	0	1	1	0	0	1	0	0	0	0	0	24.4444	34.7	239	0	6.21	0	2	36	97	20	81	98	0	0	0	168	168	2	1	1	2
1	61	1	1	1	0	0	1	0	1	0	0	0	24.5603	34.7	239	0	7	0	3	37	96	19	81	97	0	0	0	160	160	1	1	0	1
1	66	0	0	0	0	0	0	0	0	0	0	0	24.9649	41.1	198	0	13	0.071	2	37.1	95	23	110	95	1	0	0	50	45	1	0	2	4
1	68	1	0	1	1	0	0	0	0	0	1	0	23.9512	41.1	315	77.5	2	0.068	33	37.1	95	20	95	91	1	0	31	90	95	1	1	3	4
1	80	1	1	1	0	0	0	0	0	0	0	0	26.9274	35	148	23.49	5	0	26	36.8	93	25	88	95	0	0	0	0.6	1	3	0	0	5
1	70	0	1	0	0	0	1	0	0	0	0	0	25.9701	35	220	38.8	9.5	0.077	12	36.5	92	22	110	96	1	33	22	200	220	3	0	2	3
1	89	1	0	0	0	0	1	0	0	1	0	0	25.9107	35.1	222	38.8	9.33	0.076	10	36.5	91	21	110	96	1	30	20	240	200	2	0	2	3
1	68	0	1	1	1	1	0	0	0	0	0	0	30.1194	41.4	124	12	12	0.11	20	36.6	91	20	94	90	0	0	0	72	72	3	0	1	4
1	80	0	1	1	0	0	0	0	0	1	1	0	26.2596	36	149	23.49	4.83	0	25	36.9	91	26	89	94	0	0	0	0.5	1	1	0	0	5
1	82	0	0	1	0	0	0	0	0	0	0	0	28.578	44.8	170	6.7	7.96	0.069	15	37.5	90	20	95	100	0	0	0	48	48	1	0	2	0
1	68	1	1	0	0	1	0	0	0	0	0	0	29.3947	41.4	124	12	13	0.11	22	36.7	90	19	94	91	0	0	0	70	70	2	0	2	3
1	68	0	1	1	0	1	0	0	0	0	1	0	23.8751	41.1	315	77.5	2.72	0.068	30	38.3	90	21	90	90	1	0	30	96	96	3	0	4	6
1	54	0	1	1	1	0	0	0	0	0	0	1	26.7759	34.9	112	0.27	4.34	0	10	36.3	89	19	100	95	0	0	0	72	72	3	0	0	1
1	57	0	2	1	0	0	0	0	0	0	0	0	20.4467	30.5	105.8	7	6	0.063	26	36.3	89	22	99	93	1	0	0	150	160	1	0	1	4
1	68	0	0	1	0	1	0	0	0	1	0	1	28.1943	35.8	175	25.06	8.2	0.029	43	36.7	89	20	98	96	1	0	0	6	6	1	0	1	0
1	74	0	1	1	0	0	0	0	0	0	0	0	23.255	31.2	182	0	10.76	0.571	30	36.5	89	16	90	95	0	0	0	360	360	1	1	0	1
1	57	1	1	1	1	0	0	0	0	0	0	0	20.3125	30.5	105.8	7	5.9	0.063	25	36.2	88	21	101	94	0	0	0	168	168	1	0	1	3
1	89	1	1	0	0	0	0	0	0	0	0	0	28.1337	36.7	178	25.06	8.25	0.028	40	36.6	88	19	93	95	1	0	0	5	5	1	0	0	1
1	74	1	1	1	0	1	0	0	0	0	0	0	23.3234	32.2	182	0	11	0.571	32	36.6	88	26	91	96	0	0	0	300	300	1	1	0	3
1	54	0	1	0	1	1	0	0	0	0	0	0	20.0796	38.2	193.9	20	7	0.053	7	37.4	88	21	87	94	1	1	22	280	280	3	0	3	3
1	24	0	1	1	0	0	0	0	0	0	0	0	20.9572	35.6	312	0	7.8	0.365	22	37.1	88	22	80	90	1	0	0	98	90	2	0	2	5
1	24	1	1	2	0	0	0	0	0	0	0	0	20.7031	35.6	312	0	7.3	0.365	21	37	87	20	92	90	0	0	0	96	96	3	0	2	3
1	54	1	1	1	0	1	0	0	0	0	0	0	19.9594	38.2	193.9	20	6.67	0.053	6	37.2	87	22	86	95	1	2	20	288	288	3	0	0	3
1	54	1	1	1	0	0	0	0	0	0	0	1	38.856	39.7	161	8.56	6	0.012	3	37.1	85	19	118	90	1	0	0	700	500	2	0	3	3
1	76	0	1	0	0	0	0	0	0	0	0	1	18.902	32.5	137.5	0	5	0.021	15	36.1	85	21	97	98	1	0	0	700	700	2	0	0	2
1	63	1	1	1	0	0	0	0	0	0	0	0	27.4714	39.2	155	10	8.5	0.117	8	36.7	85	20	91	96	1	0	0	24	24	1	1	0	0
1	56	1	1	1	0	0	0	0	0	0	0	0	24.623	38.8	197	12.73	15.23	0.351	5	37	85	18	74	100	1	3	10	6	6	1	1	1	1
1	76	1	1	1	1	0	0	0	0	0	0	0	18.7305	35.5	137.5	0	4.91	0.021	12	36	84	20	96	97	1	0	0	720	720	3	0	0	1
1	80	0	1	0	0	1	0	0	0	0	0	0	25.3069	38.8	283	7.9	15	0.074	12	37.8	82	24	119	90	1	12	31	70	90	3	0	2	5
1	54	1	1	1	1	1	0	0	0	0	0	1	26.8386	34.9	112	0.27	4.5	0	11	36.5	82	20	100	96	0	0	0	70	70	2	1	2	0
1	64	0	1	0	0	0	1	0	0	0	0	0	26.079	42.4	368	9.15	10	0	26	37.1	82	20	97	96	1	0	31	70	70	1	0	1	0
1	63	0	1	0	0	0	0	0	0	0	0	1	25.763	31.3	68	195	15	1.971	56	37.1	82	13	95	98	0	0	0	45	45	2	1	1	0
1	56	0	0	0	1	0	0	0	0	0	0	0	23.7228	38.8	197	12.73	16	0.351	6	37.6	82	19	75	99	1	2	13	5	5	2	0	1	1
1	54	0	1	1	0	0	0	0	0	0	0	1	39.7582	39.7	161	8.56	6.08	0.012	2	37	81	18	120	91	0	0	0	720	600	1	0	1	3
1	64	1	1	1	0	0	1	0	0	0	0	0	26.0262	42.4	368	9.15	9.95	0	25	36.9	81	18	96	95	1	0	30	72	72	1	0	0	1
1	63	0	0	2	0	0	0	0	0	1	0	0	27.5312	39.2	155	10	9	0.117	9	37.7	81	21	92	97	1	0	0	20	20	1	0	1	2
1	88	0	0	0	0	0	0	0	0	1	0	1	31.2488	31	225	5.5	8.5	0.12	12	36.7	81	20	90	97	1	12	55	25	22	2	0	0	0
1	80	1	1	1	0	0	1	0	1	0	0	1	25.2595	37.8	281.7	7.9	15.37	0.074	11	36.8	80	25	120	90	1	10	35	72	92	3	0	3	6
1	82	1	1	2	1	0	0	0	0	1	0	1	28.3531	32.9	150	31.1	9	0.035	37	36.7	80	22	107	90	1	0	0	40	45	2	0	1	5
1	63	0	1	0	0	0	0	0	0	1	0	1	25.1429	31.3	68	195	14	1.971	55	37	80	12	96	99	0	0	0	48	48	3	0	2	0
1	92	1	1	0	0	0	0	0	0	1	0	1	31.245	32.3	244.2	5.5	8.59	0.11	10	36.5	80	21	89	96	1	10	50	24	24	3	1	2	2
1	82	0	1	1	0	0	0	0	0	0	0	0	23.5304	33.9	151	31.1	9.66	0.033	35	36.6	79	20	108	90	0	0	0	48	48	3	0	3	3
1	80	0	0	0	1	0	1	0	0	1	1	0	22.4813	43.5	222	0.34	8	0.1	2	37.7	77	17	78	99	0	0	0	300	300	1	0	1	1
1	80	0	0	1	1	1	1	0	0	0	0	0	22.3757	42.5	220	0.34	7.59	0.1	0	36.7	76	18	77	98	0	0	0	360	360	3	0	0	1
1	84	1	1	1	0	0	0	0	0	0	0	0	29.3199	43	290	3	16.7	0.356	0	37.7	73	24	92	91	1	8	38	24	24	3	0	2	5
1	55	1	1	1	1	0	0	0	0	0	1	0	23.533	33	227	33.7	10	0.078	32	35.6	72	23	102	91	1	0	51	45	45	1	0	1	6
1	55	0	1	1	1	0	0	0	0	0	1	0	23.4375	33	227	33.7	9.93	0.078	30	35.6	70	22	94	92	1	0	50	48	50	3	0	1	5
1	78	0	1	1	0	0	1	0	0	0	0	0	20.9572	41	180	3	17	0.365	2	37.8	70	23	92	90	1	7	22	25	22	2	0	3	5
1	60	0	1	1	0	0	0	0	1	0	0	0	31.5556	39	309	6.9	7.54	0.948	25	36.7	68	20	104	93	0	0	0	96	96	1	1	2	2
1	70	1	1	1	0	0	0	0	0	0	0	1	22.1367	37.8	220	5.6	6.1	0.084	6	37.2	68	18	91	97	1	0	0	6	6	3	1	3	0
1	60	1	1	1	0	0	0	0	0	0	0	0	31.5776	40	309	6.9	8	0.948	26	37.2	66	21	103	95	0	0	0	95	95	1	0	3	3
1	70	0	2	1	0	1	0	0	0	1	0	1	22.231	37.8	220	5.6	6	0.084	8	37.1	66	17	92	96	1	0	0	5	5	1	0	0	0
0	19	0	2	2	0	0	0	0	0	0	0	0	20.5714	44.2	280	0.2	9.5	0	10	36	141	21	93	99	1	0	0	75	70	2	1	0	6
0	19	1	1	2	0	0	0	0	0	0	0	0	19.7531	44.2	280	0.2	8.47	0	9	36.5	140	20	94	98	0	0	0	72	72	3	1	0	3
0	81	1	2	1	0	0	1	0	0	0	0	0	18.1252	44.6	157	114	14.72	0.332	10	38.4	133	21	102	97	0	0	0	24	28	2	0	1	6
0	41	0	2	2	0	0	1	0	0	0	0	0	26.6122	47.8	331	1.36	7.8	0.165	1	37.3	132	23	103	97	1	0	22	10	17	3	0	0	5
0	56	0	1	2	1	1	0	0	0	0	0	0	22.3094	44.5	217	19.91	7.3	0.049	1	36.8	130	22	121	94	1	11	22	95	95	2	1	0	5
0	81	0	2	1	1	0	0	0	0	1	0	0	17.5771	45.6	156	114	15	0.332	8	38.3	130	20	103	98	0	0	0	23	26	3	1	1	3
0	56	1	1	1	0	1	0	0	0	0	0	0	21.9713	44.5	217	19.91	7.24	0.049	0	36.9	129	23	125	95	1	10	20	96	96	3	1	0	5
0	41	1	1	1	0	0	1	0	0	0	0	0	26.9388	48.4	331	1.36	7.84	0.165	0	37.2	128	24	102	96	1	0	20	14	18	2	1	3	4
0	70	1	1	1	0	0	0	0	0	0	1	0	16.3847	34.3	176	1.89	4.79	0.149	0	37.7	127	19	78	95	1	10	30	120	120	3	0	0	4
0	35	1	1	2	0	0	0	0	0	0	0	0	29.5525	41.4	200	14.33	13	0.057	1	37.3	125	23	101	96	0	0	0	20	20	1	1	1	4
0	35	0	1	2	0	0	0	0	0	0	0	0	29.1363	40.4	200	14.33	12.88	0.057	0	37.2	122	22	100	95	0	0	0	24	24	1	0	1	5
0	65	0	2	1	1	0	0	0	0	0	0	0	22.3094	41.4	235	13.8	7.8	0.049	19	37.5	120	19	100	94	0	0	0	30	22	2	0	0	3
0	70	0	1	0	1	0	0	0	0	1	1	0	16.9747	34.3	176	1.89	5	0.149	2	37.8	120	20	79	97	1	11	31	100	100	1	1	0	3
0	65	1	1	1	0	0	0	0	0	0	0	0	22.2291	41.4	235	13.8	7.46	0.049	20	37.6	116	20	99	95	0	0	0	20	20	1	1	2	3
0	72	1	1	1	0	0	0	0	0	0	0	0	25.7117	43.1	219	14.78	7.32	0.034	18	36.9	113	20	110	95	1	15	30	24	24	3	0	3	3
0	42	0	1	1	1	0	1	0	0	0	0	0	20.5693	44	233	5.75	10.88	0	5	37.1	112	20	105	95	0	0	0	24	24	3	1	0	3
0	61	0	1	2	0	0	0	0	0	0	0	0	23.0681	39.5	212	1.18	7.79	0.036	5	36.9	112	18	89	98	0	0	0	96	72	1	0	0	2
0	72	0	1	1	0	0	0	0	0	1	0	0	22.1367	43.1	219	14.78	7	0.034	17	36.8	110	22	110	96	1	18	32	20	20	2	1	0	3
0	42	1	1	2	1	0	1	0	0	1	0	0	20.202	45	233	5.75	10	0	4	37.1	110	21	106	96	0	0	0	20	23	2	1	0	3
0	61	1	2	1	0	0	0	0	0	0	0	0	22.8928	39.5	212	1.18	7.8	0.036	13	37	110	17	89	99	0	0	0	95	70	1	1	0	1
0	40	1	2	2	0	0	0	0	0	0	0	0	19.3502	43	162	0	6.9	0.037	4	37.5	109	21	97	96	1	0	0	95	20	3	0	0	3
0	73	0	1	1	0	0	0	0	0	0	0	0	19.5988	37.6	188	75.27	7.21	0.067	12	39	109	20	81	97	0	0	0	72	24	2	0	1	2
0	50	1	1	1	0	0	0	0	0	0	0	0	16.5516	36.2	258	328	9.58	1.29	25	37.1	108	18	97	96	1	0	10	360	96	2	1	1	1
0	68	1	1	1	0	0	0	0	0	0	0	0	20.7883	34.5	259	6.89	11	0	10	36.8	108	22	90	92	1	9	40	24	24	1	1	1	5
0	73	1	1	1	1	0	0	0	0	1	0	0	19.5682	38.6	188	75.27	7	0.067	11	38.8	108	22	80	96	0	0	0	70	20	1	1	0	4
0	50	0	2	1	0	0	0	0	0	0	0	0	23.5556	39.9	210	17.9	10.53	0.045	10	37.5	107	20	116	95	0	0	0	24	190	2	0	1	2
0	60	1	1	1	0	0	1	0	0	0	0	0	22.2291	30.7	97	57.6	9.43	0.097	30	37	107	22	102	99	1	1	40	24	26	2	0	0	3
0	50	1	0	1	0	0	1	0	0	0	0	0	16.5147	44.7	230	0.74	9.82	0	10	36.5	107	20	97	96	1	0	30	24	24	1	0	0	1
0	73	1	2	1	0	0	0	0	0	0	0	0	19.4932	39.2	320	1.52	7	0	0	39.3	106	23	104	96	1	0	22	20	20	2	1	2	5
0	50	0	2	2	0	1	1	0	0	0	0	0	17.0403	45	230	0.74	9.9	0	9	36.6	106	19	96	97	1	0	32	20	20	2	1	1	1
0	50	1	0	1	1	0	0	0	0	0	0	0	33.3319	40.9	210	17.9	11	0.045	9	37.6	105	21	116	96	0	0	0	22	200	3	1	0	3
0	69	1	1	1	0	0	1	0	0	0	0	0	26.7755	38.4	293	3.92	17.96	0.023	25	37.5	105	20	110	97	1	10	30	72	72	1	0	1	1
0	73	1	1	1	0	0	1	0	0	0	1	0	19.6052	34.2	320	1.52	7.32	0	0	39.5	105	21	103	95	1	0	20	24	24	1	0	0	6
0	50	0	1	1	1	0	0	0	0	0	0	0	17.2081	37.2	258	328	9.6	1.29	24	37.2	105	19	95	97	1	0	12	300	95	2	0	0	1
0	68	0	1	2	0	0	0	0	0	0	0	0	20.8828	34.5	259	6.89	11	0	8	37.1	105	21	90	91	1	8	42	20	20	1	0	1	6
0	40	0	1	2	0	0	0	0	0	0	0	0	19.6623	42	162	0	7.27	0.037	5	37.4	104	20	96	95	0	0	0	96	24	2	1	0	2
0	63	0	1	1	0	0	0	0	0	0	0	0	16.609	30.7	209	107.96	13.79	0.931	6	37.5	104	19	86	95	0	0	0	7	8	1	0	1	2
0	61	1	1	1	0	0	0	0	0	0	0	0	16.7062	40.2	96	253	10.36	0.252	10	38.4	103	19	95	95	1	20	30	96	96	1	1	0	3
0	48	0	1	1	0	0	0	0	0	1	0	0	19.7239	46.3	182	0	8.1	0.036	0	37.2	102	22	88	95	0	0	0	360	168	1	1	0	4
0	70	1	1	1	0	0	0	0	0	0	1	1	22.3478	38.5	184	17.6	9	0.06	58	37.1	101	20	89	99	0	0	0	20	25	3	0	0	1
0	78	0	1	1	1	0	0	0	0	0	0	0	13.2118	42.5	255	0	10.19	0	30	37.4	101	20	88	96	0	0	0	20	20	1	0	0	1
0	69	0	1	2	1	0	1	0	0	0	0	0	26.1493	38.4	293	3.92	18	0.023	23	37.3	100	18	109	96	1	12	33	70	70	2	1	1	1
0	70	0	1	1	1	0	0	0	0	0	0	0	17.7086	44.5	300	9.88	11.56	0.181	15	36.5	100	19	104	94	0	0	0	24	24	1	0	1	2
0	60	0	1	2	1	1	1	0	0	0	0	0	22.1453	31.7	97	57.6	10	0.097	29	37.1	100	23	101	98	1	2	42	22	25	1	1	1	3
0	61	0	1	2	0	0	0	0	0	0	0	0	16.6531	40.2	96	253	11	0.252	9	38.5	100	18	93	96	1	22	33	93	95	1	0	1	2
0	70	0	1	0	1	0	0	0	0	1	1	1	22.2137	38.5	184	17.6	9.01	0.06	60	37	100	21	90	97	0	0	0	24	26	1	1	0	3
0	67	0	1	2	0	0	0	0	0	0	0	0	26.1286	35.1	79	148	15	0.144	15	37.1	100	23	90	95	0	0	0	70	75	3	1	2	4
0	78	1	1	2	0	0	1	0	0	0	0	0	13.3878	43.5	255	0	11	0	28	37.2	100	22	89	97	1	0	0	12	21	2	1	0	3
0	48	1	1	2	1	0	0	0	0	0	0	0	20.1348	47.3	182	0	8.2	0.036	1	37.1	100	21	87	96	0	0	0	350	160	1	0	0	3
0	63	1	1	1	0	0	0	0	0	0	0	0	16.7573	30.7	209	107.96	14	0.931	5	37.6	100	18	86	96	0	0	0	8	6	1	1	1	1
0	54	1	1	1	1	0	0	0	0	0	0	0	23.4052	38	246	16.01	6.65	0.071	30	36.8	99	18	104	93	1	6	20	120	100	2	1	1	3
0	70	1	1	1	0	0	0	0	0	0	0	0	17.5771	44.5	300	9.88	12	0.181	13	36.6	98	21	105	95	0	0	0	20	20	3	0	0	4
0	71	1	1	1	1	0	1	0	0	0	0	0	23.8054	38	124	176	8	0.11	10	36.2	98	20	100	96	1	6	46	160	95	1	1	0	1
0	31	1	2	1	0	0	0	0	0	0	0	0	28.125	44.1	379	0.5	12.2	0	0	37.5	98	18	97	93	0	0	0	24	24	3	0	2	3
0	67	1	1	1	0	1	0	0	0	0	0	0	26.079	35.1	79	148	14.1	0.144	16	37	98	24	90	96	0	0	0	72	74	1	0	1	3
0	78	0	1	1	0	0	0	0	0	0	0	1	22.2291	37.5	181	4	8	0.058	38	37.2	97	21	101	96	0	0	0	25	22	1	0	0	3
0	71	0	1	1	0	0	1	0	0	0	0	0	23.6832	36.4	124	176	7.7	0.11	11	36.5	97	19	99	95	1	5	45	180	96	3	0	0	2
0	31	0	1	2	0	0	0	0	0	0	0	0	28.1625	44.1	379	0.5	12	0	1	37.7	97	17	97	94	0	0	0	20	20	2	1	0	2
0	51	1	1	1	1	0	1	0	0	0	0	0	23.03	44.4	325	0	11.57	0.044	0	36.5	96	21	121	95	1	6	3	168	168	1	0	0	4
0	66	0	2	1	0	1	0	0	0	0	0	0	30.971	37.3	264	5	5.2	0.035	15	37.1	96	20	111	96	0	0	0	168	72	2	1	0	1
0	72	0	1	2	0	0	0	0	0	0	0	0	16.7883	43.5	248	0	9	0	13	37.6	96	22	110	100	0	0	0	70	20	3	0	1	3
0	78	1	2	1	1	0	1	0	0	0	0	0	22.1453	36.5	181	4	7.5	0.058	40	36.3	96	20	100	95	0	0	0	24	24	2	1	0	2
0	51	0	1	2	0	0	1	0	0	0	0	0	22.8625	45.5	325	0	12	0.044	1	36.7	95	20	119	96	1	6	5	160	150	2	1	1	1
0	66	1	2	1	0	1	0	0	0	1	0	0	29.5942	37.3	264	5	5.9	0.035	13	37.1	95	21	110	95	0	0	0	160	70	2	0	2	4
0	72	0	1	1	1	0	0	0	0	0	0	0	15.9499	43.5	248	0	8.95	0	15	37.5	95	20	109	100	0	0	0	72	24	2	1	0	1
0	47	1	1	1	0	0	0	0	0	0	0	0	17.6609	39.5	234	0	5	0	4	37.1	95	20	106	99	0	0	0	25	8	2	1	0	1
0	67	1	1	1	1	1	0	0	0	0	0	0	20.6905	44.2	243	0	8	0.091	1	37	95	17	93	96	0	0	0	50	45	1	0	0	1
0	41	0	1	1	0	0	0	0	0	0	0	0	24.2424	42.5	222	9.87	8.1	0.032	10	37.2	95	19	90	96	1	1	12	40	45	1	1	0	1
0	60	0	1	1	0	0	1	0	0	0	0	0	16.598	49.9	216	11.3	14.85	0.237	30	37.2	94	18	100	94	0	0	0	168	160	1	0	2	2
0	67	0	1	1	0	0	0	0	0	0	0	0	20.5457	44.2	243	0	7.34	0.091	0	36.8	94	18	96	97	0	0	0	48	48	3	1	0	1
0	55	0	2	1	0	0	0	0	0	0	0	0	24.2424	36	239	0	9.3	0.026	11	36.6	94	22	85	97	0	0	0	100	70	1	1	0	3
0	66	0	1	1	0	0	0	0	0	0	0	0	17.1581	40	230	4.62	9.67	0	10	36.6	93	18	108	95	0	0	0	168	72	2	0	0	2
0	55	1	2	1	1	0	0	0	0	0	0	0	24.1672	36	239	0	9.25	0.026	12	36.5	93	21	86	96	0	0	0	120	72	3	0	0	3
0	42	1	1	1	1	0	0	0	0	1	0	1	29.3848	44.9	332	4.8	19.09	0.058	10	36.3	92	21	134	92	1	0	15	48	24	1	0	2	5
0	85	0	1	0	0	0	1	0	0	0	0	0	17.7154	36.7	240	23.21	5.03	0.035	10	36.5	92	20	106	94	0	0	0	96	96	1	1	2	2
0	54	0	1	2	0	0	0	0	0	0	0	0	23.3469	38	246	16.01	6.6	0.071	29	36.9	92	19	103	94	1	5	22	113	80	3	1	1	2
0	61	1	1	0	0	0	1	0	0	0	0	0	25.8586	34.8	155	56	9.5	0.036	0	36.4	92	20	98	97	1	0	40	96	100	2	1	0	1
0	66	0	1	1	0	0	0	0	0	0	0	0	24.1389	46.2	120	47	4.22	0.233	0	36.8	92	21	80	93	0	0	0	96	144	1	1	2	5
0	69	0	1	1	0	1	1	0	1	0	0	0	22.4059	41.6	264	4.52	7	0.053	11	37.5	91	19	116	95	0	0	0	22	16	2	0	0	2
0	59	0	1	1	1	0	1	1	0	0	0	0	27.0552	39.5	196	51.42	6.47	0	30	38.2	91	28	116	93	0	0	0	24	24	1	0	1	7
0	63	0	1	1	0	0	0	0	0	1	0	0	17.8748	35.1	138	45.87	6	0.075	13	36	91	20	115	95	1	0	0	100	120	2	1	0	3
0	54	1	2	1	0	0	0	0	0	0	0	0	24.841	43.5	292	0	4.2	0	6	37.6	91	21	106	98	0	0	0	40	40	2	1	1	3
0	61	0	1	1	0	0	1	0	0	0	0	0	25.9472	34.8	155	56	9.6	0.036	1	36.5	91	21	97	98	1	0	43	95	95	3	0	0	3
0	80	1	1	1	1	1	1	0	0	0	0	0	25.7117	41.4	126	12	3.68	0.087	20	36.6	91	20	96	95	0	0	0	96	98	1	1	1	2
0	66	1	1	0	1	0	0	0	0	0	0	0	24.2349	42.2	120	47	4.2	0.233	1	36.7	91	22	84	94	0	0	0	94	100	2	0	1	4
0	42	0	1	2	0	0	0	0	0	0	0	1	28.6501	43.9	332	4.8	19	0.058	9	37.7	90	20	132	93	1	0	16	45	22	1	1	2	2
0	69	1	1	1	1	1	1	0	0	0	0	0	22.5827	41.6	264	4.52	7.24	0.053	12	37.3	90	20	122	96	0	0	0	20	20	3	1	0	0
0	83	1	1	1	1	0	1	0	0	0	0	0	17.3589	34.1	147	45.87	6.02	0.0884	15	37	90	19	114	96	0	0	0	120	100	1	1	0	0
0	59	1	1	1	0	0	1	1	0	0	0	0	25.8876	39.5	196	51.42	6.6	0	29	38.3	90	27	109	92	0	0	0	20	20	1	1	1	6
0	77	1	2	1	0	0	0	0	0	0	0	0	25.4581	37.7	235	23.21	5	0.025	8	37.5	90	21	108	93	0	0	0	100	95	2	0	1	4
0	54	0	1	1	0	0	0	0	0	0	0	0	24.7676	43.5	292	0	4.23	0	5	36.6	90	22	107	96	0	0	0	48	48	3	0	0	2
0	47	0	1	2	0	0	0	0	0	0	0	0	17.9628	38.5	234	0	6.51	0	5	37	90	19	106	98	0	0	0	20	10	2	1	2	0
0	66	1	1	1	0	0	0	0	0	0	0	0	18.4157	40	230	4.62	9.7	0	9	36.7	90	19	106	94	0	0	0	160	70	1	0	0	1
0	60	1	1	1	0	0	1	0	0	0	0	0	16.4644	50	216	11.3	15.2	0.237	29	37.1	90	17	97	93	0	0	0	160	150	1	1	3	2
0	80	0	1	2	0	0	0	0	0	0	0	1	25.7657	42.6	124	12	4	0.087	18	37.6	90	21	96	96	0	0	0	98	90	3	1	2	2
0	41	1	1	1	0	0	0	0	0	0	0	0	24.977	41.5	222	9.87	8.16	0.032	11	37.1	90	20	89	95	1	2	10	48	48	1	1	0	1
0	30	0	1	2	0	0	1	0	0	0	0	0	16.7573	45.8	258	0	7.19	0	10	36.8	89	21	93	96	0	0	0	24	24	2	0	2	2
0	72	1	1	1	0	1	0	0	0	0	0	0	24.977	43	264	4.96	11.07	0.028	20	36.7	88	20	118	95	1	15	40	2	2	2	1	0	1
0	80	0	1	0	0	0	1	0	0	0	0	0	27.6601	40.8	175	8.22	8	0	1	36	88	22	116	92	1	22	26	25	22	1	1	1	5
0	67	1	2	1	0	0	0	0	0	0	0	0	20.83	45.3	251	3.4	10	0.012	6	37	88	19	109	99	0	0	0	50	20	3	1	1	0
0	33	0	1	1	0	0	1	0	0	0	0	0	28.3737	42.6	315	16	7	0.043	5.2	36.5	88	21	108	96	0	0	0	70	70	2	1	0	2
0	70	1	1	0	0	0	0	0	0	1	0	0	23.3377	39.8	135	43.3	9.6	0.035	1	37.1	88	20	108	95	0	0	0	50	25	3	1	0	1
0	65	1	1	0	0	0	1	0	0	0	0	0	21.5045	39.1	239	53	15	0.033	0	37.1	88	21	107	97	0	0	0	77	75	2	1	1	2
0	65	1	1	2	0	0	0	0	0	0	0	0	13.1254	46.8	200	0.51	9.5	0	8	37.1	88	21	103	98	1	0	0	70	20	1	1	0	2
0	72	1	1	1	0	0	0	0	0	0	0	0	23.255	40.5	222	13.2	8	0.132	1	36.7	88	21	99	96	0	0	0	400	160	2	1	0	2
0	55	1	1	0	1	0	0	0	0	0	0	0	17.51	47.2	228	25.2	5	0.536	1	37.1	88	13	92	98	0	0	0	20	22	2	1	0	0
0	33	1	2	2	0	0	0	0	0	0	0	0	23.1084	48.9	200	9.92	8.52	0	0	37.3	88	20	90	97	1	0	18	72	72	3	1	0	0
0	42	1	1	1	0	0	0	0	0	0	0	0	25.7812	42.3	229	5	8	0	1	37.6	88	21	89	96	0	0	0	150	95	2	0	0	2
0	51	0	1	1	0	0	0	0	0	0	0	0	18.3391	41.4	229	0	8.25	0	5	36.2	88	20	73	96	0	0	0	24	24	2	0	0	1
0	72	0	1	1	0	0	0	0	0	1	0	0	24.3141	43	264	4.96	11	0.028	19	36.6	87	22	117	96	1	16	42	1	1	3	0	1	2
0	73	1	1	0	1	0	0	0	0	0	0	0	22.8374	40.6	245	3.07	8	0	5	37	87	22	115	96	0	0	0	12	10	2	0	0	2
0	85	1	1	1	0	0	0	0	0	0	0	0	27.6817	39.8	180	8.22	8.09	0	0	36.8	87	21	115	93	1	25	20	24	24	1	0	1	4
0	88	0	1	0	0	0	0	0	0	1	0	0	23.4337	39.1	136	43.3	9.68	0.031	0	37	87	19	107	95	0	0	0	48	24	2	1	0	1
0	33	1	2	2	0	0	1	0	0	0	0	0	28.7197	41.6	315	16	7.5	0.043	5.3	36.3	87	20	107	95	0	0	0	72	72	1	1	0	1
0	48	0	1	2	0	0	0	0	0	0	0	0	18.7883	44.6	370	0	7.36	0	5	37.1	87	19	101	93	0	0	0	10	10	2	0	1	2
0	30	1	1	2	0	0	1	0	0	0	0	0	16.609	45.8	258	0	7.2	0	9	36.7	87	22	93	97	1	0	0	20	20	3	0	0	2
0	55	0	1	2	0	0	0	0	0	0	0	0	15.7616	47.2	228	25.2	4.88	0.536	0	37.2	87	12	92	97	0	0	0	24	24	1	1	0	0
0	72	0	1	1	0	0	0	0	0	0	0	0	23.8754	40.5	222	13.2	8.4	0.132	0	36.8	87	20	92	97	0	0	0	408	168	2	0	0	0
0	81	0	1	1	1	1	0	0	1	0	0	0	18.1252	41.2	78	16	16	0.045	48	36.7	87	20	89	96	1	32	31	1	70	2	1	1	0
0	73	0	1	1	0	0	0	0	0	0	0	0	23.4586	40.6	245	3.07	8.06	0	4	36.9	86	21	112	97	0	0	0	15	15	1	1	0	2
0	65	0	1	1	1	0	1	0	1	1	0	0	21.3593	39.1	239	53	14.6	0.033	0	36.7	86	20	107	96	0	0	0	72	76	1	0	1	0
0	33	1	2	2	0	0	0	0	0	0	0	0	23.4586	49.6	200	9.92	8	0	1	37.5	86	22	89	98	1	0	17	70	70	2	1	2	2
0	81	1	1	1	1	0	1	0	0	1	0	0	17.9931	40.2	179	16	15.9	0.045	50	36.5	86	19	88	95	1	30	32	2	74	2	1	2	1
0	67	0	2	1	1	0	0	0	0	0	0	0	20.5457	45.3	251	3.4	9.9	0.012	7	36.9	85	20	108	98	0	0	0	48	24	2	1	0	0
0	82	1	1	1	0	0	0	0	0	0	0	0	19.9792	35.8	75	136	7.5	7.13	2	37	85	22	107	99	1	0	0	24	25	1	0	0	2
0	86	0	1	1	0	0	0	0	0	1	0	0	19.313	34.8	70	136	7.41	8.13	1	37	85	20	106	98	0	0	0	26	28	2	1	0	0
0	48	1	2	1	1	0	0	0	0	1	0	0	18.4992	45.6	370	0	7.36	0	4	37.2	85	20	100	94	0	0	0	8	8	3	1	0	1
0	42	0	1	2	0	0	0	0	0	0	0	0	26.5625	41.2	229	5	9	0	0	37.6	85	20	90	97	0	0	0	168	96	1	1	0	0
0	51	1	2	1	1	0	0	0	0	0	0	0	18.8092	41.4	229	0	8.6	0	6	36.3	85	21	72	95	0	0	0	20	20	2	1	0	4
0	69	0	1	1	0	0	0	0	0	0	0	0	22.0741	43.1	243	0.69	5.4	0.067	20	37.2	84	20	79	93	0	0	0	48	48	1	1	1	3
0	56	0	1	1	0	0	0	0	0	0	0	0	22.913	41.7	288	0	6.5	0.045	7	36.3	83	21	106	93	1	22	42	20	22	3	1	1	4
0	75	0	1	1	1	1	0	0	0	0	0	0	22.2656	40.3	141	5.2	6.99	0.026	0	36.8	82	20	109	94	0	0	0	48	50	1	1	0	1
0	56	1	1	2	0	0	0	0	0	0	0	0	22.8374	41.7	288	0	5.88	0.045	8	36.4	82	20	106	94	1	20	40	24	26	2	0	0	1
0	57	1	1	1	0	0	0	0	0	0	0	0	23.1481	40	283	0	9.56	0.032	0	36.8	82	21	102	98	1	6	20	168	120	2	0	0	2
0	72	0	1	1	0	0	0	0	0	0	0	0	16.2788	40.4	214	0	5.22	0	5	37.1	81	20	109	98	0	0	0	168	96	2	0	0	0
0	63	1	1	2	0	0	0	0	0	0	0	0	25.0657	42.5	260	2.21	9.9	0	2	37.8	81	21	108	92	0	0	0	165	75	2	1	1	4
0	57	0	1	2	1	0	0	0	0	0	0	0	23.9869	40	283	0	9.6	0.032	0	36.9	81	22	102	99	1	5	22	160	100	3	1	0	2
0	75	0	1	2	0	1	0	0	0	0	0	0	24.623	37.8	362	0	12	0.044	4	37.1	81	26	97	97	1	10	32	95	70	3	0	0	3
0	82	1	1	1	0	0	0	0	0	0	0	0	30.2618	37	116	102	8	0.074	58	37.3	81	21	95	95	0	0	0	45	25	1	1	3	3
0	67	0	1	2	0	0	0	0	0	0	0	0	22.151	49	290	1.14	8	0.51	3	36.8	81	18	93	96	0	0	0	30	30	2	1	0	0
0	31	1	1	2	0	0	0	0	0	0	0	0	25.7122	43.6	243	6.7	6.79	0.037	9	37.2	81	20	82	100	0	0	0	30	20	2	1	1	0
0	54	0	1	1	0	0	0	0	0	0	0	0	31.5115	32.5	123	101	11	0.312	1	37.7	81	20	79	96	0	0	0	100	95	1	0	0	1
0	80	1	2	1	1	1	1	0	0	0	0	0	25.8572	43.8	315	3.79	7	0.06	1	36.5	81	21	78	92	0	0	0	50	20	1	1	1	5
0	72	1	2	1	1	0	0	0	0	1	0	0	15.7808	45	214	0	6	0	4	37.2	80	21	110	99	0	0	0	160	95	1	1	0	2
0	75	1	1	1	0	0	0	0	0	0	0	1	22.3757	40.3	141	5.2	7	0.026	0	36.7	80	21	110	93	0	0	0	40	55	1	1	3	4
0	63	0	1	1	0	0	0	0	0	0	0	0	24.974	42.5	260	2.21	9.83	0	3	36.8	80	20	108	93	0	0	0	168	72	3	0	2	2
0	75	1	1	1	1	1	0	0	0	1	0	1	25.2595	37.8	362	0	12.17	0.044	5	37	80	25	97	96	1	10	30	96	72	1	1	0	3
0	82	0	1	0	0	0	0	1	0	1	0	0	29.0487	36	117	102	7.54	0.074	60	37.2	80	20	95	94	0	0	0	48	24	1	1	0	1
0	67	0	1	1	0	0	0	0	0	0	0	0	22.0317	49	290	1.14	7.53	0.51	5	36.7	80	19	92	95	0	0	0	36	36	3	0	0	1
0	69	1	1	1	1	0	0	0	0	0	0	0	22.2137	43.1	243	0.69	5	0.067	22	37.1	80	19	82	92	0	0	0	50	45	1	1	1	2
0	31	1	2	1	1	0	0	0	0	0	0	0	26.5759	43.6	243	6.7	6	0.037	10	37.3	80	21	81	99	0	0	0	20	18	2	1	0	2
0	54	1	1	2	0	0	0	0	0	0	0	0	30.7958	32.5	123	101	10.8	0.312	0	36.7	80	19	80	95	0	0	0	120	96	2	1	0	1
0	58	1	1	2	0	0	0	0	0	0	0	1	24.2382	42.9	230	317.73	20	0.078	25	37.3	80	21	78	96	0	0	0	70	70	3	0	2	3
0	80	0	1	1	0	0	0	0	0	0	0	1	26.1012	42.7	317	3.79	6.58	0.06	0	36.5	80	20	77	93	0	0	0	48	24	3	1	1	3
0	58	0	1	1	1	0	0	0	0	0	0	1	24.341	42.9	230	317.73	19.64	0.078	26	37.2	79	20	77	95	0	0	0	72	72	2	0	0	2
0	66	0	1	1	0	1	0	0	0	0	0	0	21.1073	37.9	212	13.42	7.8	0	14	36.2	78	17	111	95	1	0.3	42	70	70	2	0	0	1
0	53	1	2	2	1	0	0	0	0	0	0	0	20.4294	41.1	256	1.91	5.2	0	8	36.7	78	19	103	97	1	0	0	200	200	2	0	0	0
0	65	0	1	1	0	0	0	0	0	0	0	0	12.5414	46.8	200	0.51	8.55	0	10	36.7	78	22	100	99	0	0	0	72	24	2	1	0	2
0	83	1	1	1	0	0	0	0	0	0	1	1	22.0932	34.7	81	37.4	4.42	0.046	5	36.8	78	18	97	96	0	0	0	144	96	2	1	0	0
0	54	0	1	1	0	0	0	0	0	0	0	0	18.8092	38.1	153	12	9.4	0.071	13	36.9	78	20	95	95	0	0	0	48	49	1	1	0	1
0	66	0	1	2	0	0	1	1	0	0	0	0	17.4747	40.5	229	5.84	4.7	0.039	7	36.5	77	22	107	99	1	0.2	33	20	20	1	1	1	2
0	69	0	0	1	1	0	0	0	0	0	0	0	20.8307	38.5	293	0	5	0	1	37.2	77	17	106	96	1	5	22	28	20	1	0	0	0
0	53	0	2	1	0	0	0	0	0	0	0	0	20.2848	41.1	256	1.91	5.19	0	9	36.5	77	18	102	96	0	0	0	216	216	3	0	0	0
0	52	0	1	2	0	0	1	0	0	0	0	1	22.0243	36.7	78	37.4	3	0.045	3	36.9	77	19	98	94	0	0	0	112	95	2	1	2	1
0	54	1	1	2	1	0	0	0	0	0	0	0	19.7232	38.1	153	12	9.5	0.071	12	37.8	77	21	94	96	0	0	0	45	48	2	0	0	2
0	23	0	2	1	0	0	0	0	0	0	0	0	20.202	32.8	128	0	5.1	0.125	6	37	77	18	83	95	1	0	0	75	70	3	1	0	1
0	66	1	1	1	1	1	0	0	0	0	0	0	21.0077	37.9	212	13.42	7.96	0	15	36.1	76	19	110	96	1	0.1	40	72	72	1	0	0	0
0	69	1	0	1	1	0	0	0	0	0	0	0	20.2865	38.5	293	0	5.42	0	0	37.1	76	18	106	95	1	3	20	30	24	2	1	0	1
0	23	1	1	1	0	0	0	0	0	0	0	0	20.3244	32.8	128	0	5.54	0.125	7	37.2	76	19	82	96	0	0	0	72	73	2	0	0	0
0	72	1	1	2	0	0	0	0	0	0	0	0	22.3133	36	275	5	6	0.075	1	36.7	75	21	98	96	0	0	0	70	70	3	0	0	2
0	73	0	1	2	0	0	1	0	0	0	1	0	20.7157	38.4	212	0.53	5	0.136	1	36.2	75	29	77	98	1	7	25	100	95	1	0	0	4
0	72	0	1	1	0	0	0	0	0	1	0	0	22.1893	35	275	5	5.5	0.075	0	36.8	74	22	95	97	0	0	0	72	74	2	1	1	2
0	66	1	1	1	1	0	1	0	0	0	0	0	17.3134	40.5	229	5.84	4.66	0.039	8	36.5	73	20	107	98	1	0.1	30	24	24	1	0	0	0
0	62	0	1	1	0	0	0	0	0	0	0	0	23.4224	40.2	259	0	13.98	0	25	37.1	73	18	99	97	0	0	0	168	96	3	0	1	0
0	66	0	1	1	0	0	0	1	0	1	0	1	23.4952	38.1	153	8.7	5.69	0	15	37	73	20	98	93	0	0	0	24	24	1	0	3	2
0	65	0	1	1	0	0	0	0	0	0	0	0	18.5901	34.8	136	5.5	4.93	0.024	2	36.8	73	21	85	95	0	0	0	670	408	2	1	0	3
0	73	1	1	1	0	0	0	0	0	0	0	0	20.5714	38.4	212	0.53	5.27	0.136	0	36.3	73	18	76	95	1	6	20	120	96	2	1	0	2
0	62	1	1	1	0	0	0	0	0	0	0	0	24.1965	40.2	259	0	14	0	24	37	72	17	98	98	0	0	0	160	95	2	0	1	0
0	81	1	1	2	0	0	1	0	0	0	0	1	17.9634	38.2	82	81	12	0.186	58	37.2	72	20	88	94	0	0	0	50	40	3	0	0	1
0	65	1	1	1	0	0	0	0	1	1	0	0	19.1001	34.8	136	5.5	4.9	0.024	1	37.2	72	21	85	96	0	0	0	660	400	1	1	1	2
0	68	0	1	1	0	0	0	0	0	0	0	0	16.9467	38.1	358	0	5	0.022	23	37.5	71	18	102	97	1	0	45	265	70	2	1	1	0
0	72	0	1	1	0	0	0	0	0	0	0	0	20.202	41.8	189	0	7.6	0	8	36.6	71	20	97	97	0	0	0	4	4	1	1	0	0
0	51	0	1	1	0	0	0	0	0	0	0	0	24.6904	39.9	366	0.91	9.5	0	4	37.7	71	19	88	96	0	0	0	4	4	3	0	0	0
0	81	0	1	1	1	1	0	0	1	0	0	0	18.1818	37.2	81	81	11.7	0.186	60	37.3	71	21	88	93	0	0	0	48	49	2	1	2	4
0	68	1	1	1	0	0	0	0	0	0	0	0	15.7895	38.1	358	0	5.02	0.022	25	36.5	70	19	105	98	1	0	40	168	72	2	0	2	0
0	66	1	1	1	1	0	0	0	0	0	0	1	23.6128	38.1	153	8.7	5.69	0	13	37	70	21	100	92	0	0	0	20	20	1	1	1	4
0	66	0	1	2	0	0	0	1	0	1	0	0	19.433	38	65	181	8.8	0.078	18	37.1	70	21	99	97	0	0	0	45	60	2	1	0	2
0	72	1	1	0	0	0	0	0	0	0	0	0	19.8413	43	189	0	8	0	6	36.5	70	21	98	98	0	0	0	2	1	1	1	0	2
0	51	1	1	1	1	0	0	0	0	0	0	0	24.7676	39.9	366	0.91	9.36	0	5	36.7	70	18	90	95	0	0	0	5	5	2	1	0	1
0	66	1	1	2	0	0	0	0	0	0	1	0	18.2099	41	175	20	12	0.351	4	37.2	69	20	107	98	0	0	0	122	70	1	1	0	0
0	86	1	1	1	0	0	0	0	0	0	0	0	19.5717	37	70	181	8.84	0.088	20	36.3	69	20	98	98	0	0	0	48	50	1	1	0	0
0	72	0	1	2	0	0	0	0	0	1	0	0	22.2137	35.3	116	18.2	2.49	0.068	40	37.5	69	21	87	96	0	0	0	96	72	2	0	2	2
0	84	0	1	1	0	0	1	0	0	0	0	0	17.8566	40	180	20	11.22	0.361	5	37.1	68	19	106	97	0	0	0	120	72	1	1	0	0
0	69	1	1	1	1	0	1	0	1	0	0	0	17.6309	44.1	219	0	17.8	0.036	1	37	68	24	101	96	0	0	0	240	96	1	0	1	2
0	72	1	1	1	0	1	0	0	0	0	0	0	22.0604	35.3	116	18.2	3	0.068	38	37.2	68	22	90	97	0	0	0	95	70	2	1	2	2
0	29	0	1	2	0	0	0	0	0	0	0	0	14.8502	44.7	229	14.4	5.48	0.318	5	36.9	68	17	89	93	0	0	0	120	48	2	0	1	2
0	60	1	2	1	0	0	0	0	0	0	0	0	22.5827	46.8	297	0.73	6.7	0.031	1	35.6	67	17	123	93	0	0	0	140	140	2	0	1	3
0	75	1	1	1	0	0	0	0	0	0	0	1	16.2369	43	166	18.05	8.32	0.059	10	37.1	67	18	84	94	0	0	0	24	24	1	0	0	1
0	60	0	1	2	0	0	0	0	0	0	0	0	23.2434	45.8	297	0.73	6.86	0.031	2	36.6	66	18	122	94	0	0	0	144	144	1	0	0	1
0	69	0	1	0	0	0	1	0	0	0	0	0	17.782	44.1	219	0	18	0.036	0	37.1	66	23	104	95	0	0	0	220	95	3	1	1	3
0	29	1	2	2	0	0	0	0	0	0	0	0	15.3469	44.7	229	14.4	5.47	0.318	4	36.8	66	19	90	94	1	0	0	110	45	3	0	0	1
0	75	0	2	1	0	1	0	0	0	0	0	0	17.2389	45	166	18.05	8	0.059	9	37.2	66	29	84	95	0	0	0	20	20	1	1	0	4
0	79	0	1	0	0	0	0	0	0	1	1	1	21.6441	31.4	70	80.5	6.36	0.095	0	36.8	64	19	88	95	0	0	0	24	24	2	1	0	1
0	72	1	2	1	0	1	0	0	0	0	0	0	22.6757	36.8	200	2.68	7.1	0.101	4	37.6	62	21	85	95	1	0	0	10	13	1	1	0	3
0	86	0	1	1	0	0	0	0	0	0	0	0	22.7583	35.9	201	2.68	7.46	0.104	5	36.8	61	22	84	96	0	0	0	12	12	1	0	0	2
0	79	1	1	0	1	0	0	0	0	0	0	0	21.7784	32.4	70	80.5	6.5	0.095	2	37.6	60	20	89	96	0	0	0	20	20	2	0	0	0
0	63	1	1	0	0	0	0	0	0	0	0	0	18.3768	40.1	234	0	6.7	0	19	36.8	56	18	86	98	0	0	0	90	95	2	0	0	0
0	79	1	0	1	1	0	1	0	0	1	1	1	25.462	42.5	205	0.4	6.7	0	1	36.7	55	21	108	96	0	0	0	30	20	1	1	0	2
0	63	0	1	1	0	0	0	0	0	0	0	0	18.2531	40.1	234	0	6.41	0	20	36.9	55	19	87	97	0	0	0	96	96	2	1	0	0
0	79	0	0	1	0	0	0	0	0	0	0	0	25.711	43.5	205	0.4	5.78	0	0	36.6	54	20	108	95	0	0	0	24	24	1	0	0	1
