# Supplementary material for: Predicting the risk of acute respiratory failure among asthma patients—the A2-BEST2 risk score: a retrospective study
Source: PeerJ journal article supplement (doi:10.7717/peerj.16211), 2023-10-24
Supplement: Supplementary_table_1.docx [file Supplementary_table_1.docx]

Supplementary Table 1 Variables in the a statistics-driven model ( Model A ) using multivariable regression.

| Variable | OR (95%CI) | *P*-value | coefficients | coefficients with shrinkage |
| --- | --- | --- | --- | --- |
| Economic condition |  |  |  |  |
| Rich | Reference | | | |
| Not rich | 6.157(1.291-29.361) | 0.023 | 1.818 | 0.590 |
| BMI |  | <0.001 |  |  |
| <25 | Reference | | | |
| ≥25，<30 | 4.488(2.148-9.375) | <0.001 | 1.501 | 0.487 |
| ≥30 | 8.387(1.837-38.297) | 0.006 | 2.127 | 0.691 |
| Albumin |  |  |  |  |
| ≥40 | Reference | | | |
| <40 | 3.312(1.652-6.640) | 0.001 | 1.197 | 0.389 |
| Area of pulmonary infection |  | 0.018 |  |  |
| 0 | Reference | | | |
| >0~≤20 | 2.933(0.980-10.062) | 0.076 | 1.096 | 0.356 |
| >20 | 5.796(1.607-20.903) | 0.007 | 1.757 | 0.570 |
| MAP |  |  |  |  |
| ≥110 | Reference | | | |
| <110 | 3.146(1.060-9.335) | 0.039 | 1.146 | 0.372 |
| Smoking | 3.113(1.622-5.976) | 0.001 | 1.136 | 0.369 |
| No long-term regular medication treatment | 4.348(2.219-8.519) | <0.001 | 1.470 | 0.477 |

Shrinkage factor:0.3247
