# Supplementary material for: Predicting the risk of acute respiratory failure among asthma patients—the A2-BEST2 risk score: a retrospective study
Source: PeerJ journal article supplement (doi:10.7717/peerj.16211), 2023-10-24
Supplement: Supplementary_table_2.docx [file Supplementary_table_2.docx]

Supplementary Table 2 Three approaches for model development and their performance in external validation group

| Approaches | Variables | Discrimination | Calibration | Precision |
| --- | --- | --- | --- | --- |
|  |  | C- statistics (95% CI) | H-L /P-value | Birer score |
| Model A: the statistics- driven model. | 7 | 0.897(0.822-0.971) | 2.065/0.979 | 0.0645 |
| Model B: clinical knowledge- driven model | 7 | 0.890(0.815-0.965) | 3.573/0.827 | 0.0640 |
| Model C: decision tree model. | 11 | 0.867(0.842-0.892) | NA | 0.0773 |
