# Supplementary figures and images for: Predicting the risk of acute respiratory failure among asthma patients—the A2-BEST2 risk score: a retrospective study
Source: PeerJ journal article supplement (doi:10.7717/peerj.16211), 2023-10-24

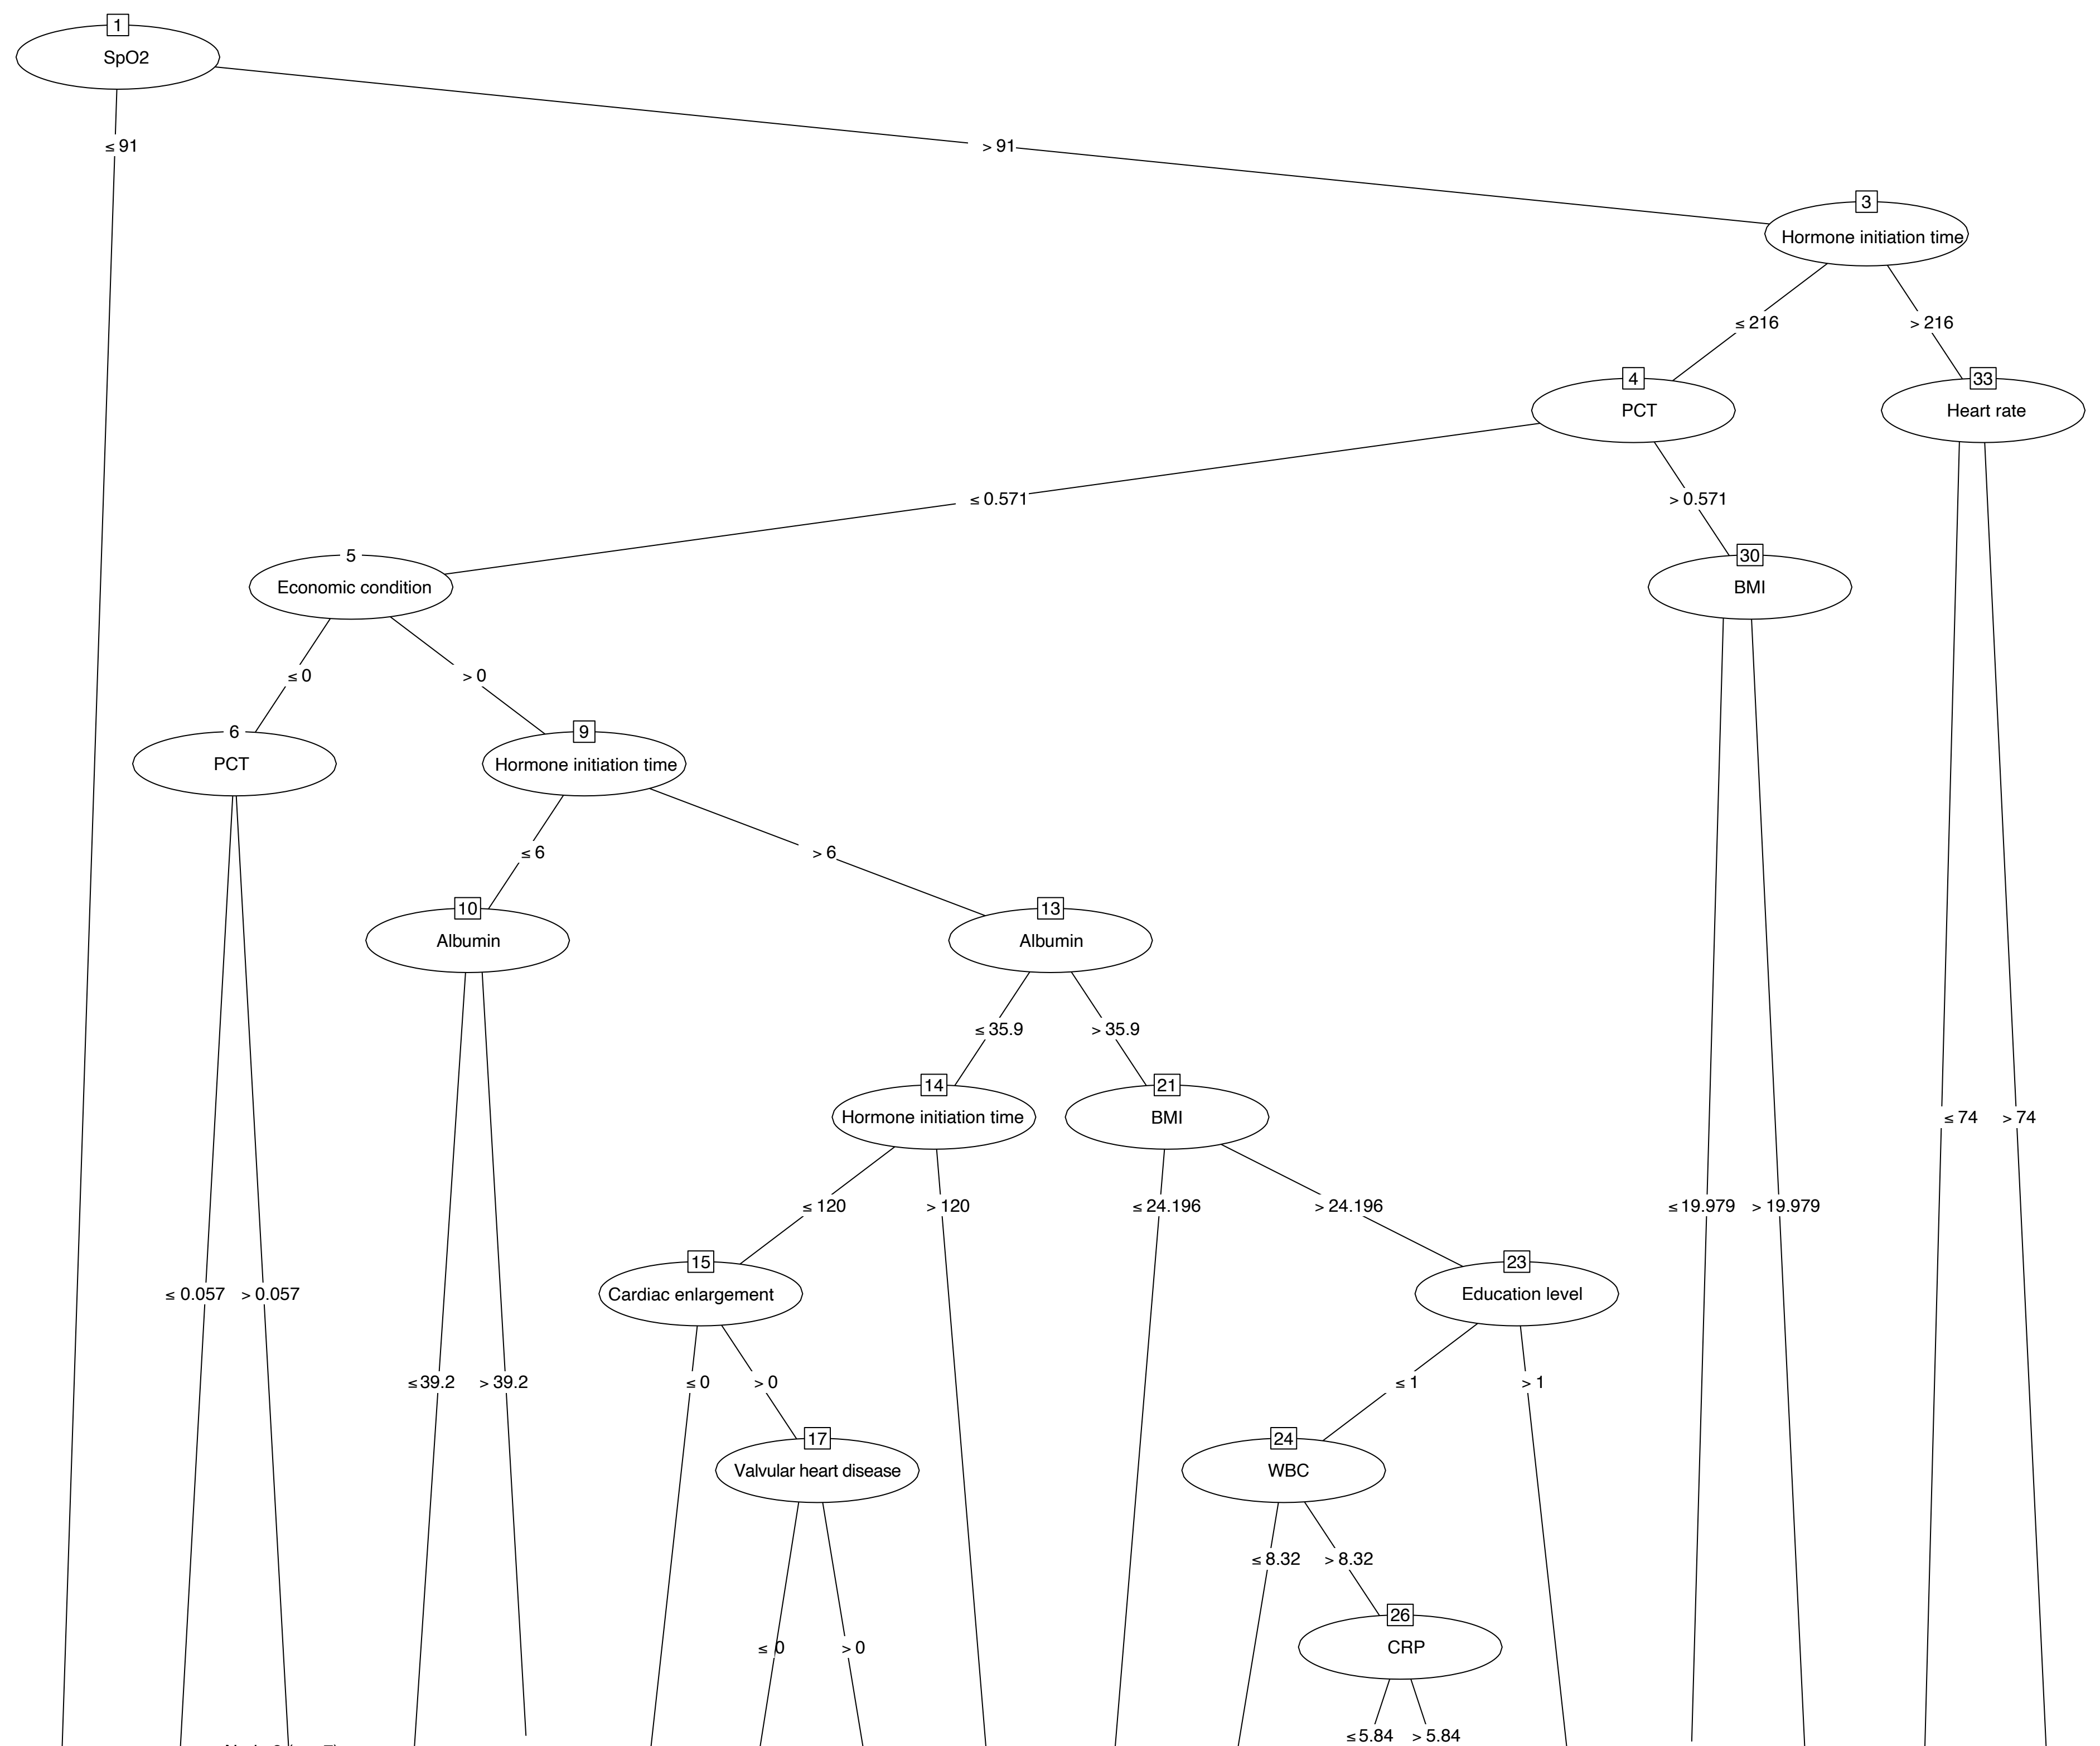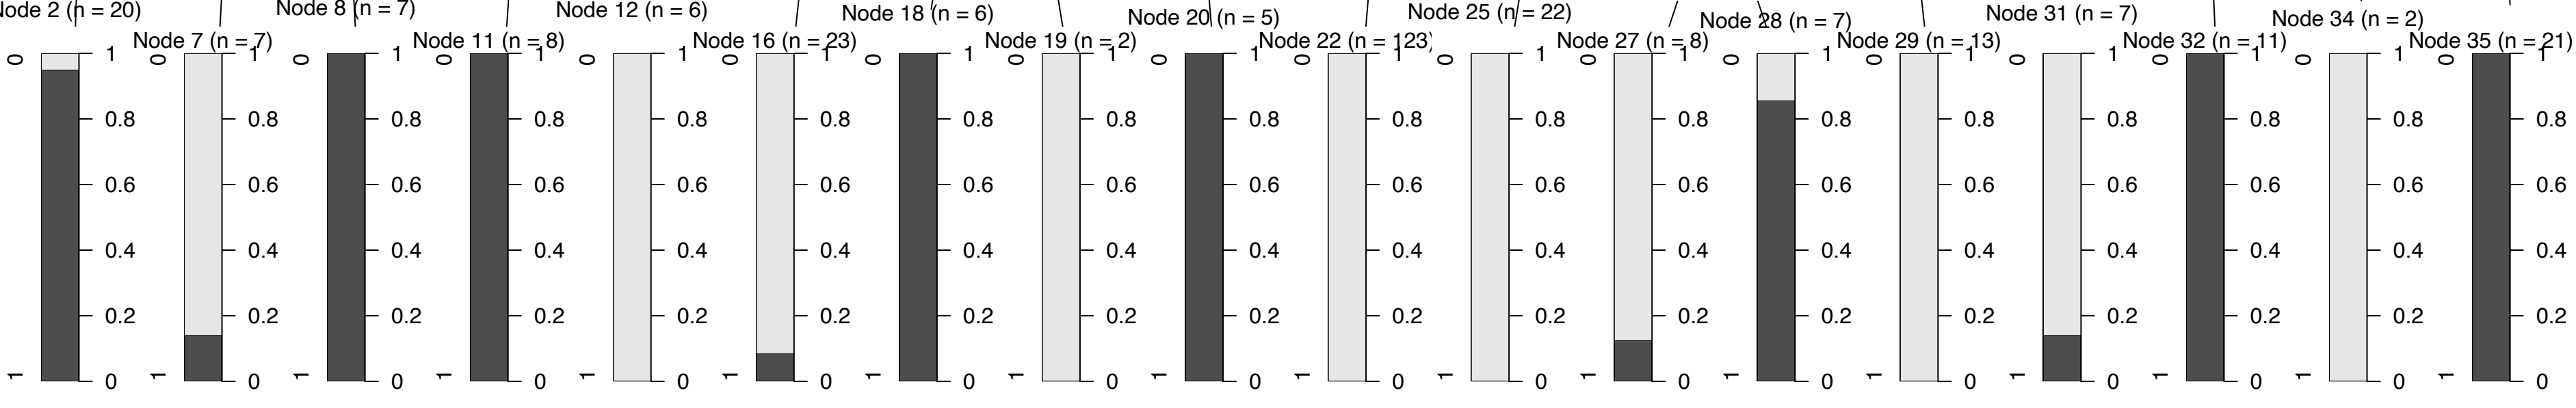

Supplement: Supplementary_Figure_2.pdf [file Supplementary_Figure_2.pdf]

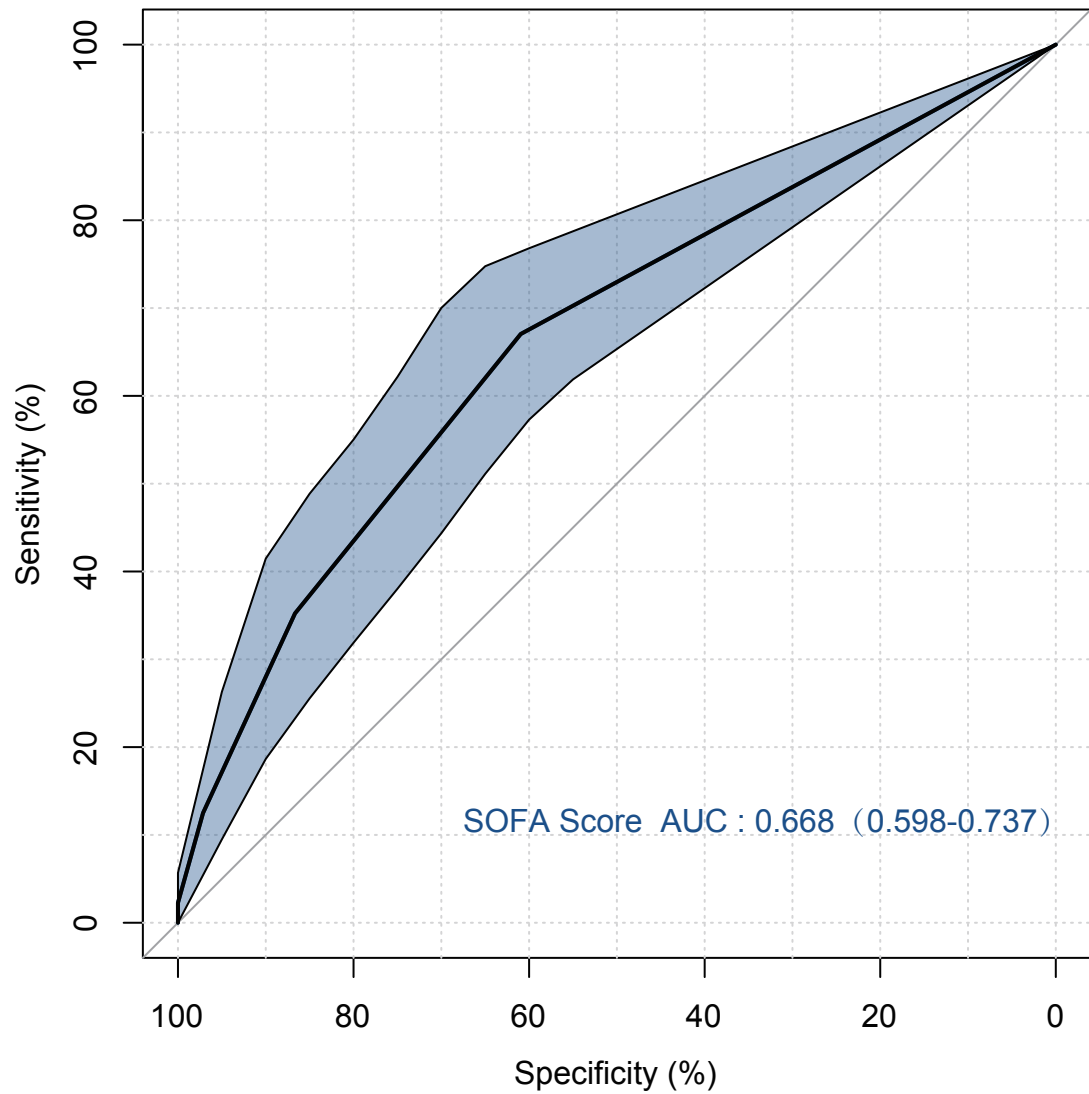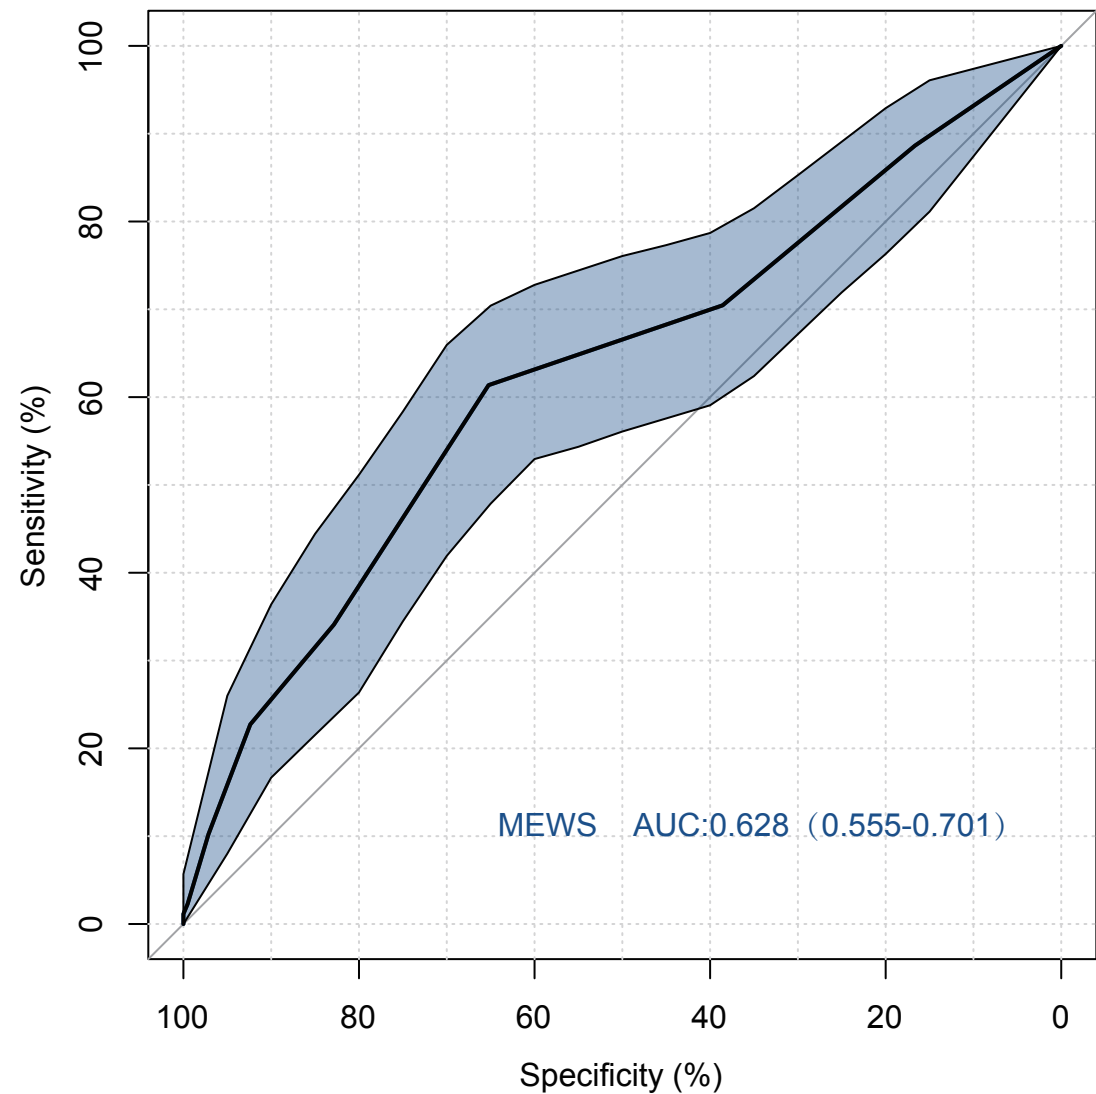

Supplement: Supplementary_Figure_3.pdf [file Supplementary_Figure_3.pdf]

A

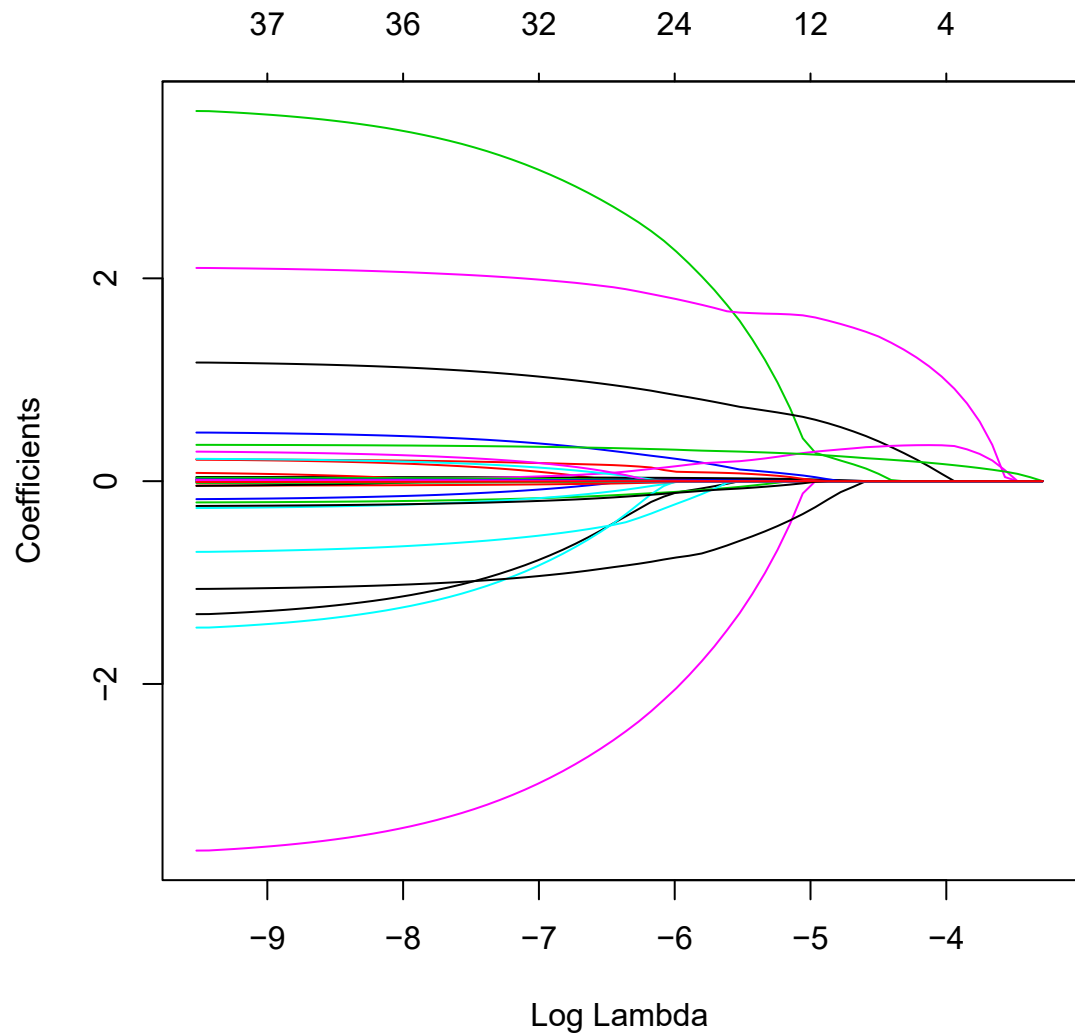

B

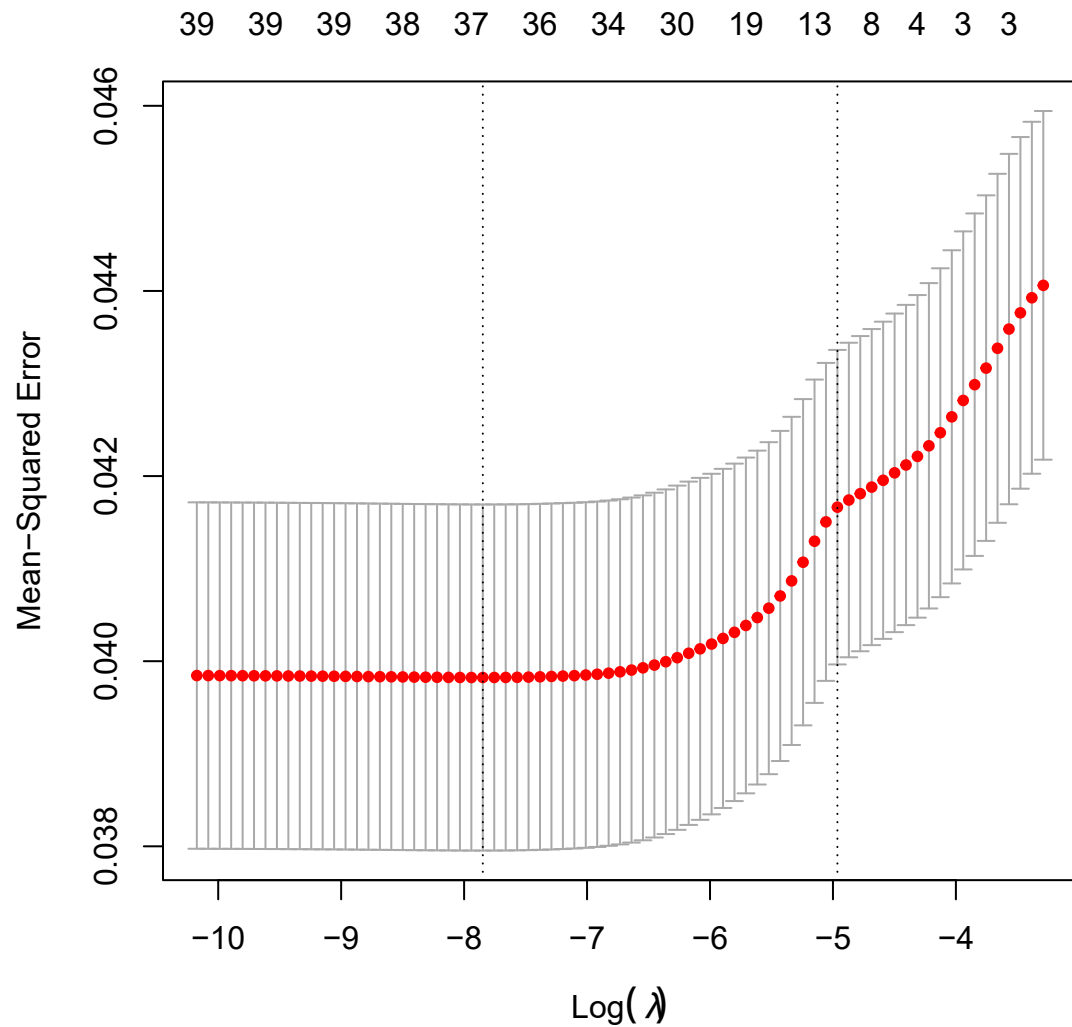

Supplement: supplementary_figure_1.pdf [file supplementary_figure_1.pdf]
